# Supplementary material
Source: PubMed Central journal article supplement (PMC1937551)

Chromosome I

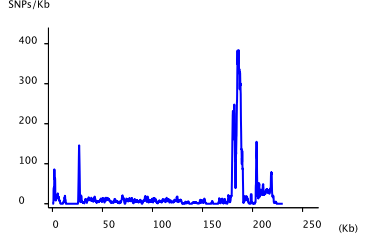

Chromosome II

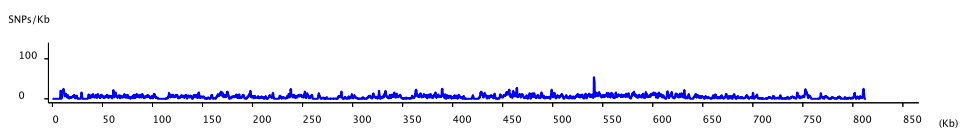

Chromosome III

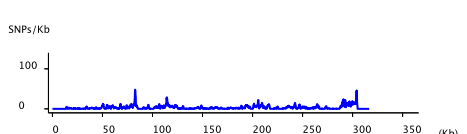

Chromosome IV

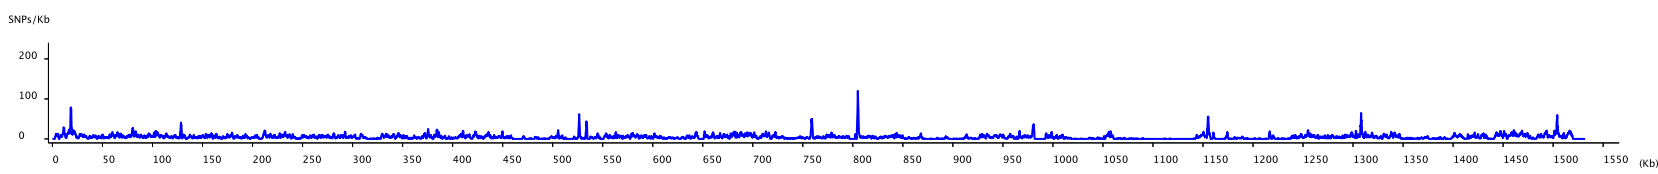

Chromosome V

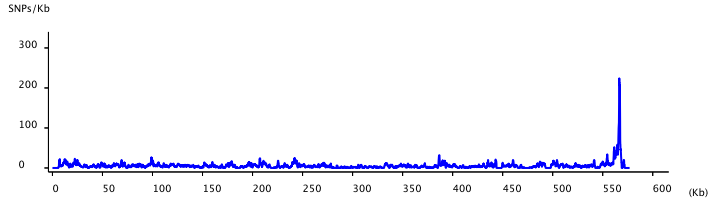

Chromosome VI

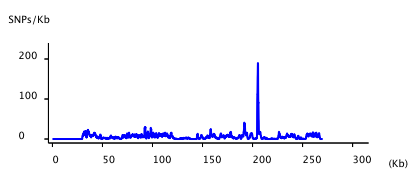

Chromosome VII

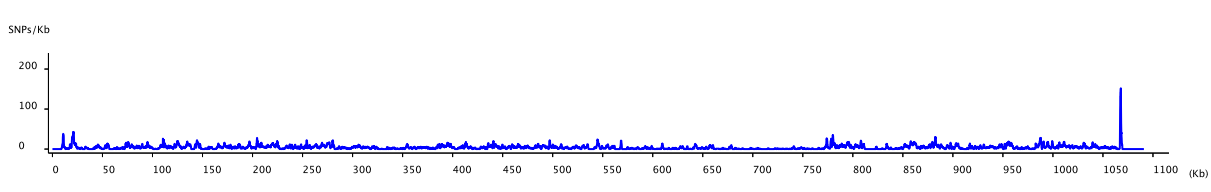

Chromosome VIII

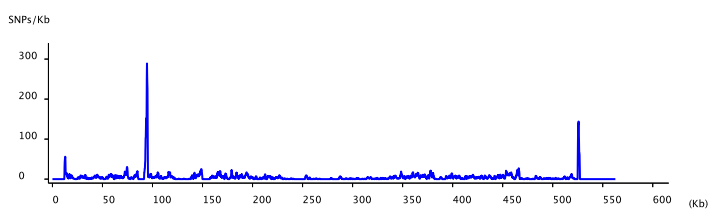

Chromosome IX

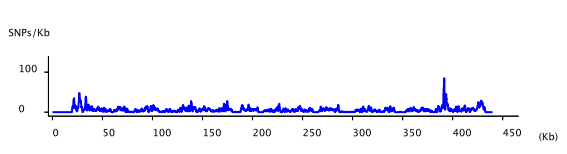

Chromosome X

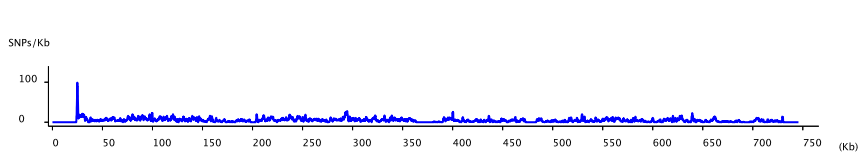

Chromosome XI

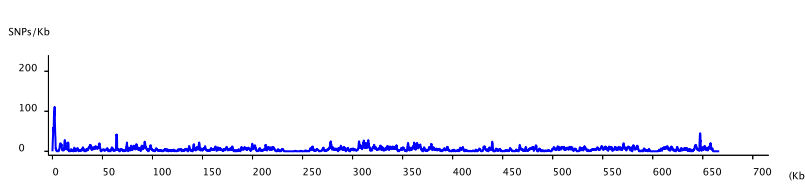

Chromosome XII

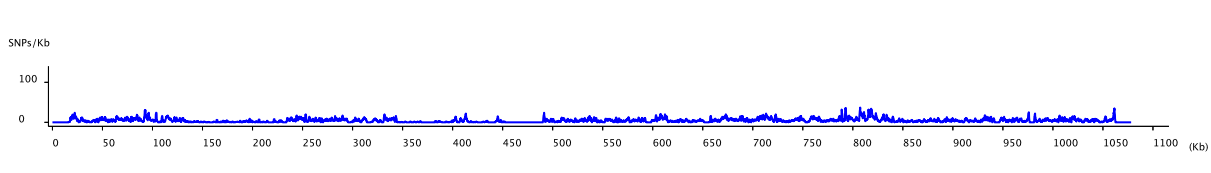

Chromosome XIII

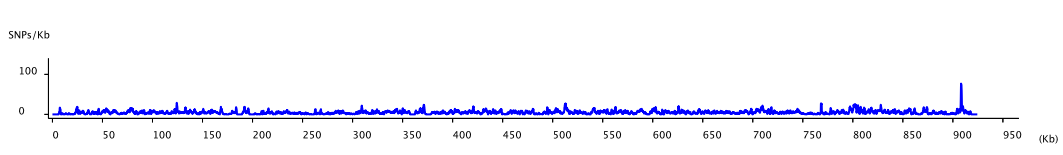

Chromosome XIV

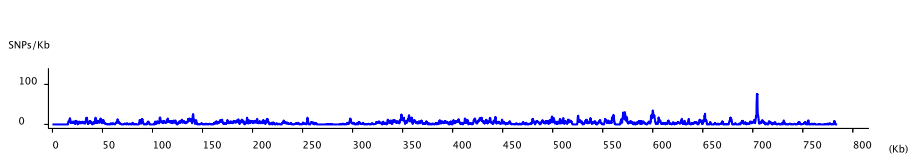

Chromosome XV

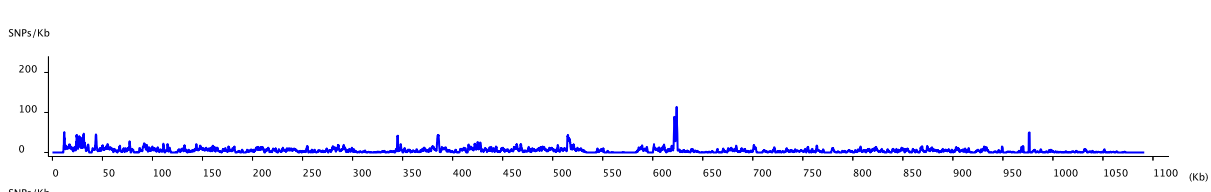

Chromosome XVI

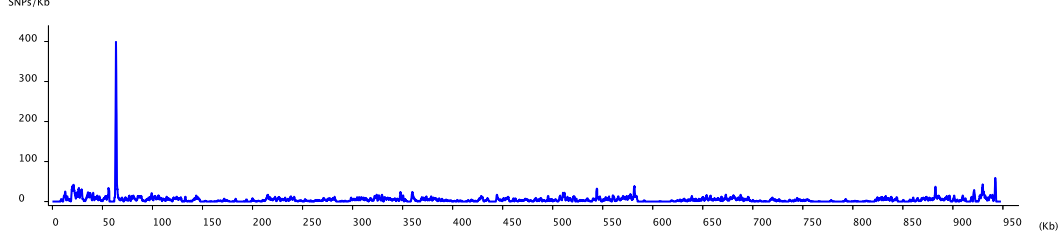

Supplement: pnas_0701291104_3.pdf [file pnas_0701291104_3.pdf]
