# Supplementary material
Source: PubMed Central journal article supplement (PMC1937551)

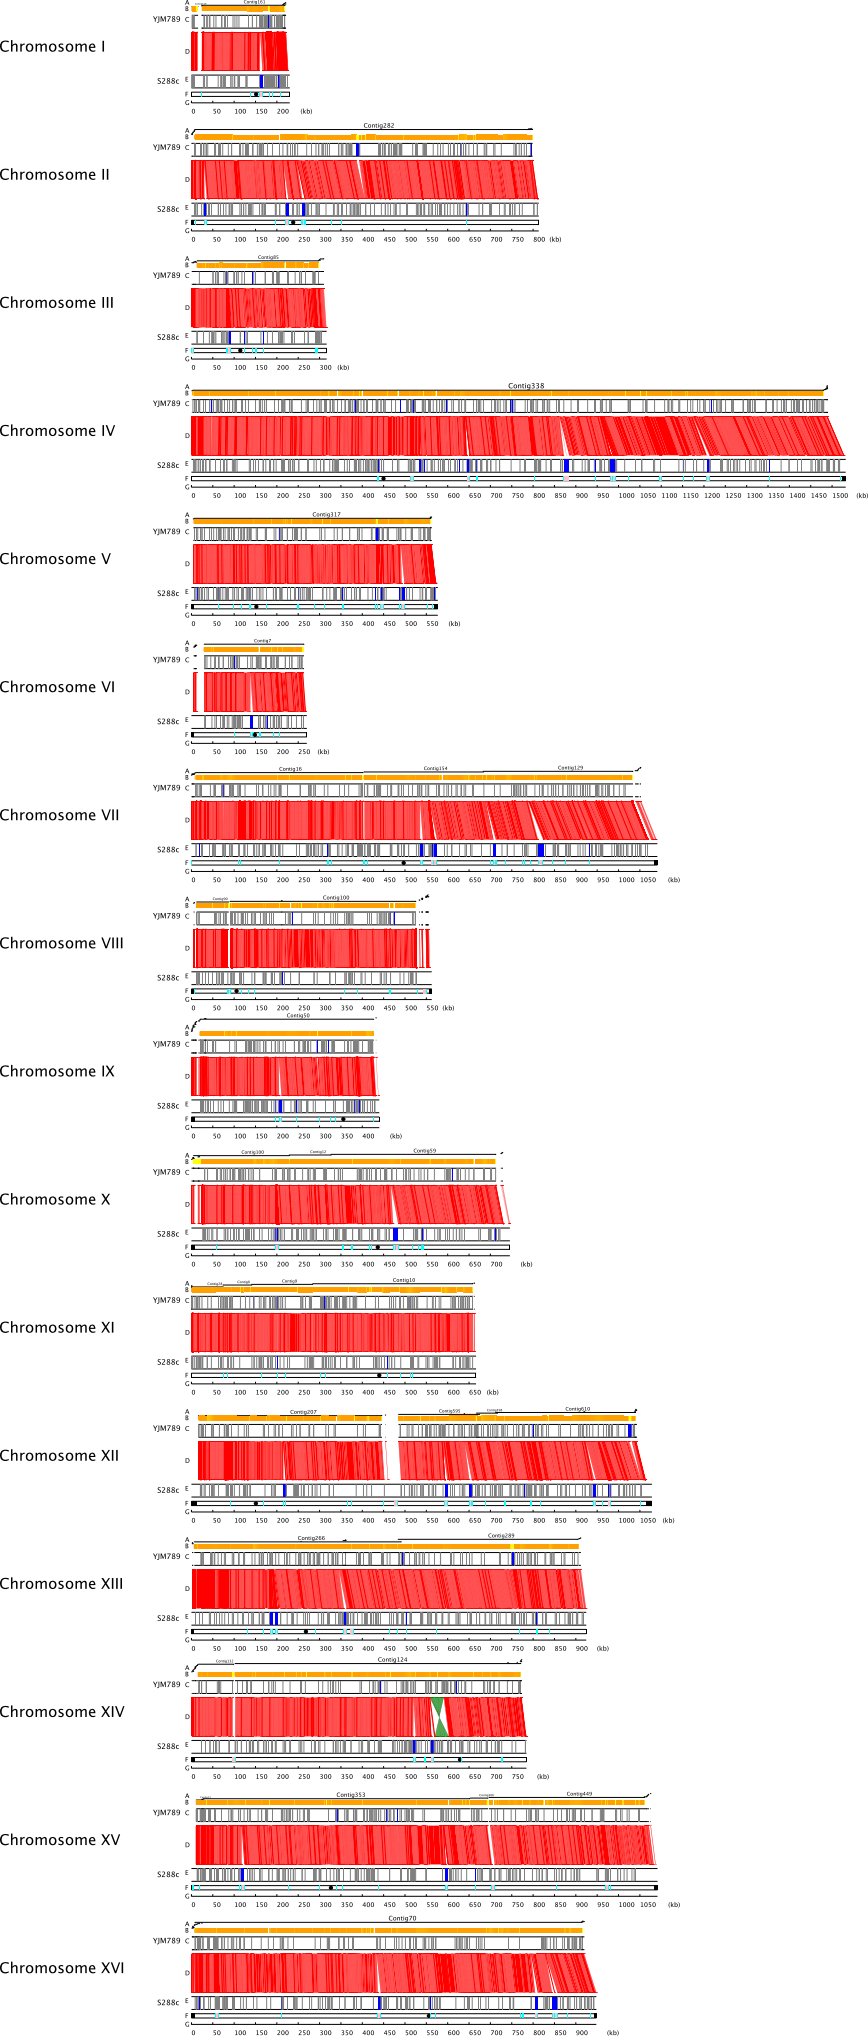

Supplement: pnas_0701291104_1.pdf [file pnas_0701291104_1.pdf]

**SI Figure 6**

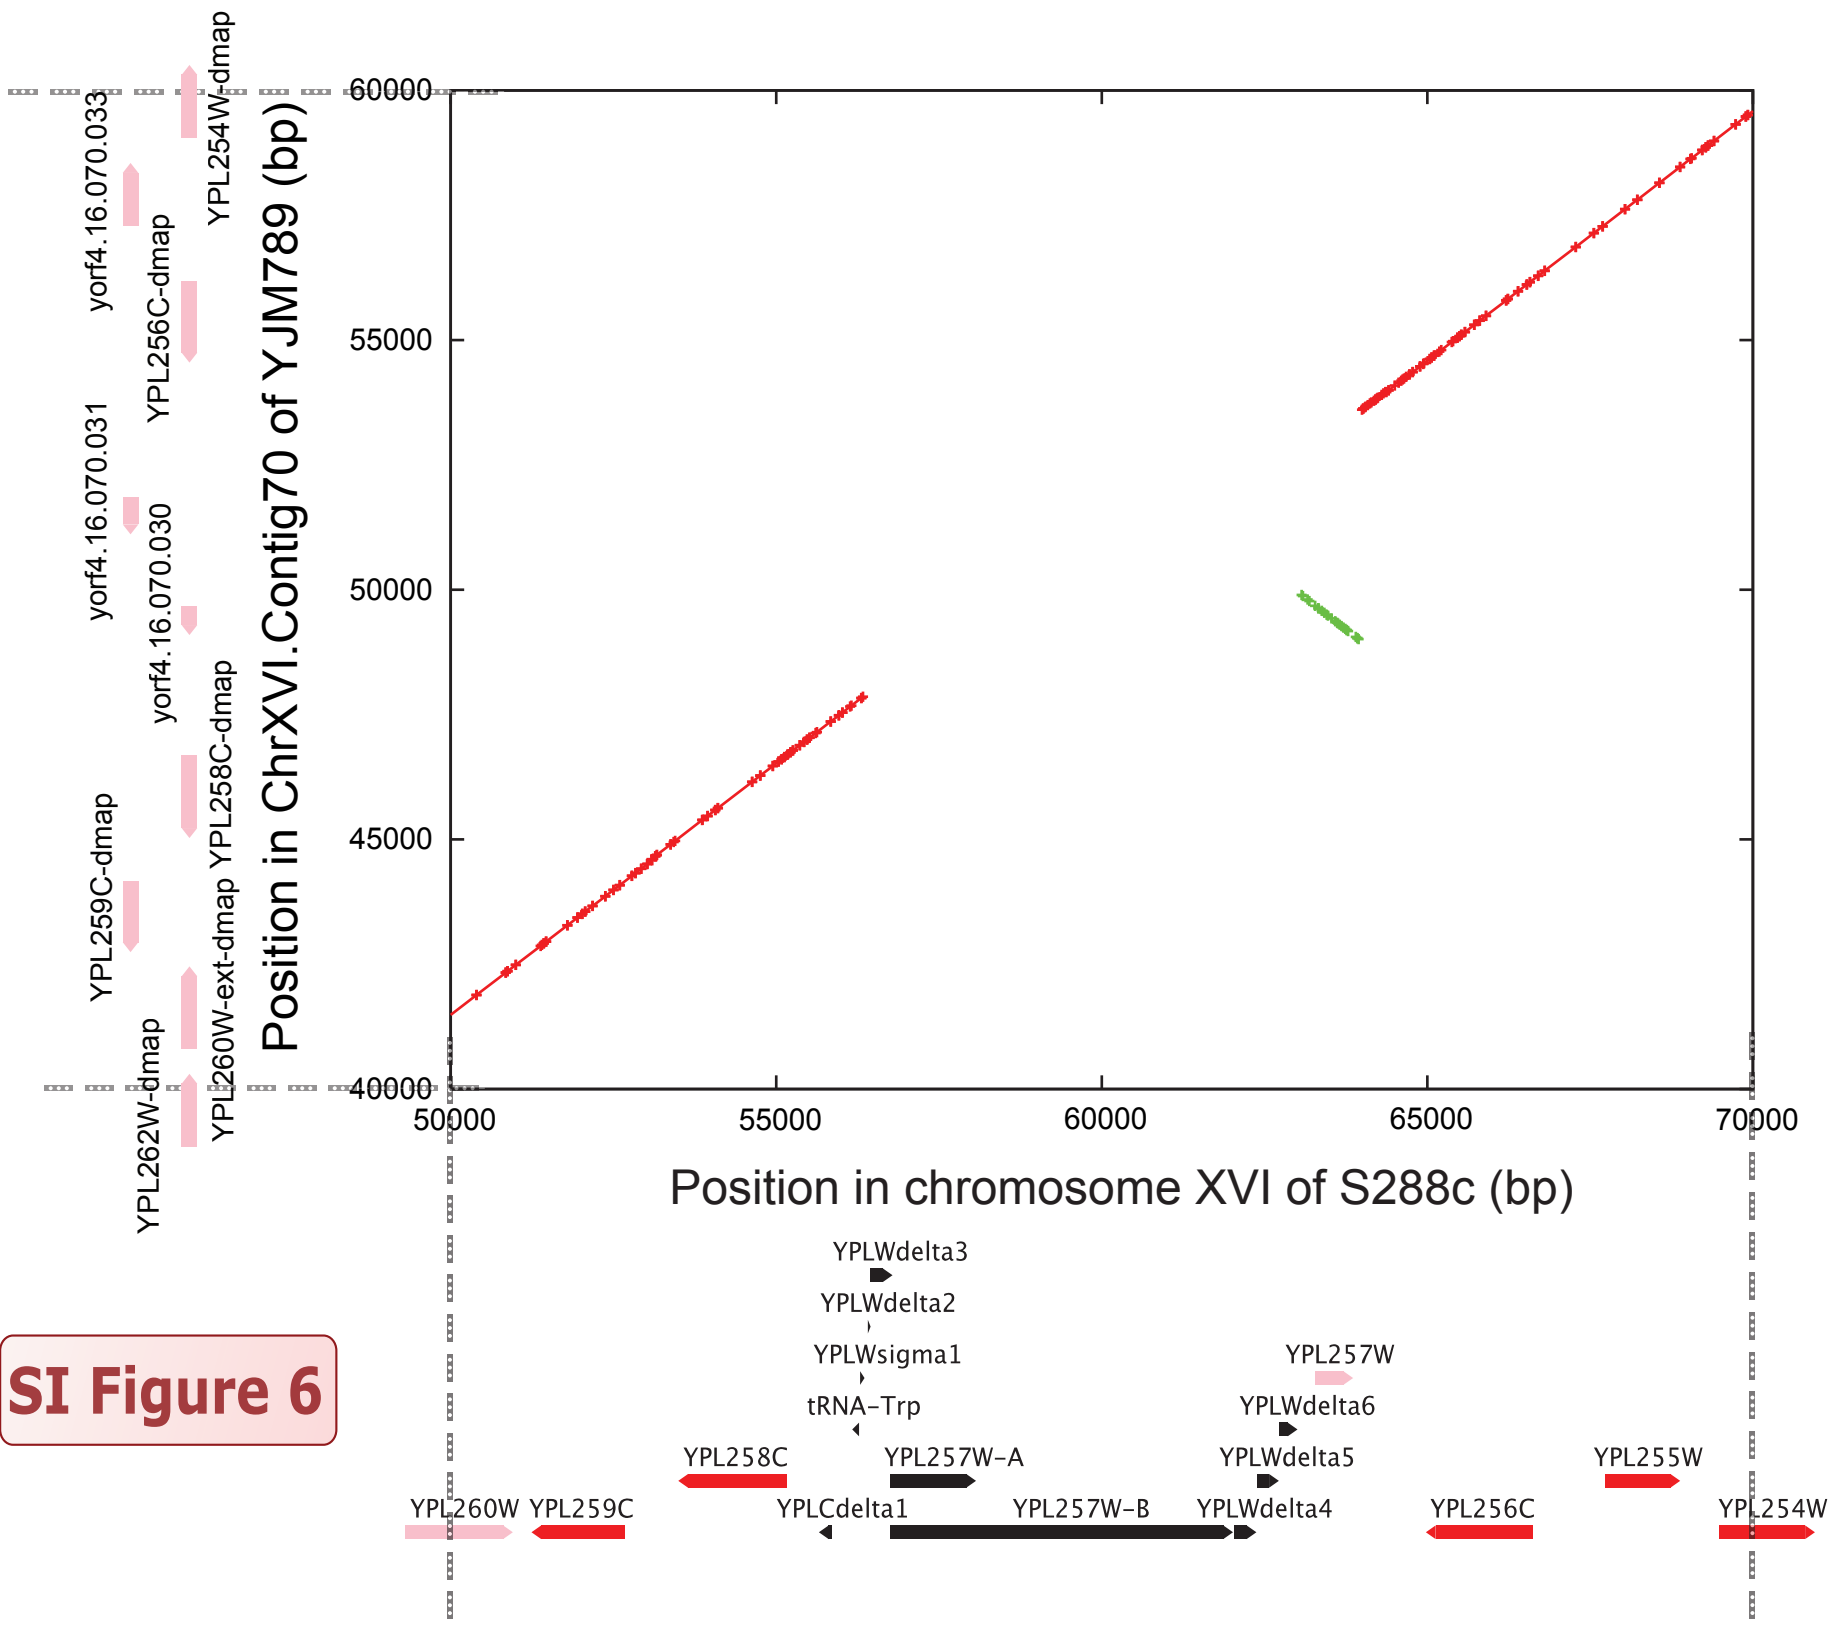

Supplement: pnas_0701291104_2.pdf [file pnas_0701291104_2.pdf]

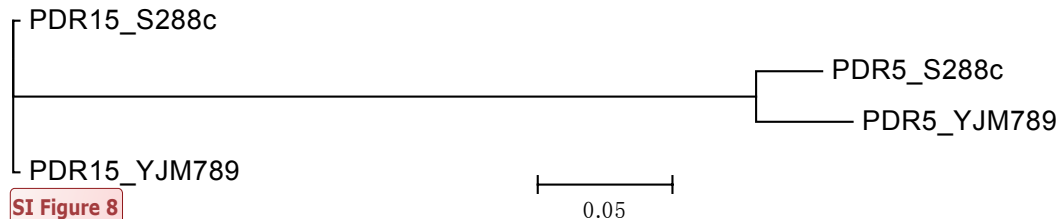

Supplement: pnas_0701291104_4.pdf [file pnas_0701291104_4.pdf]

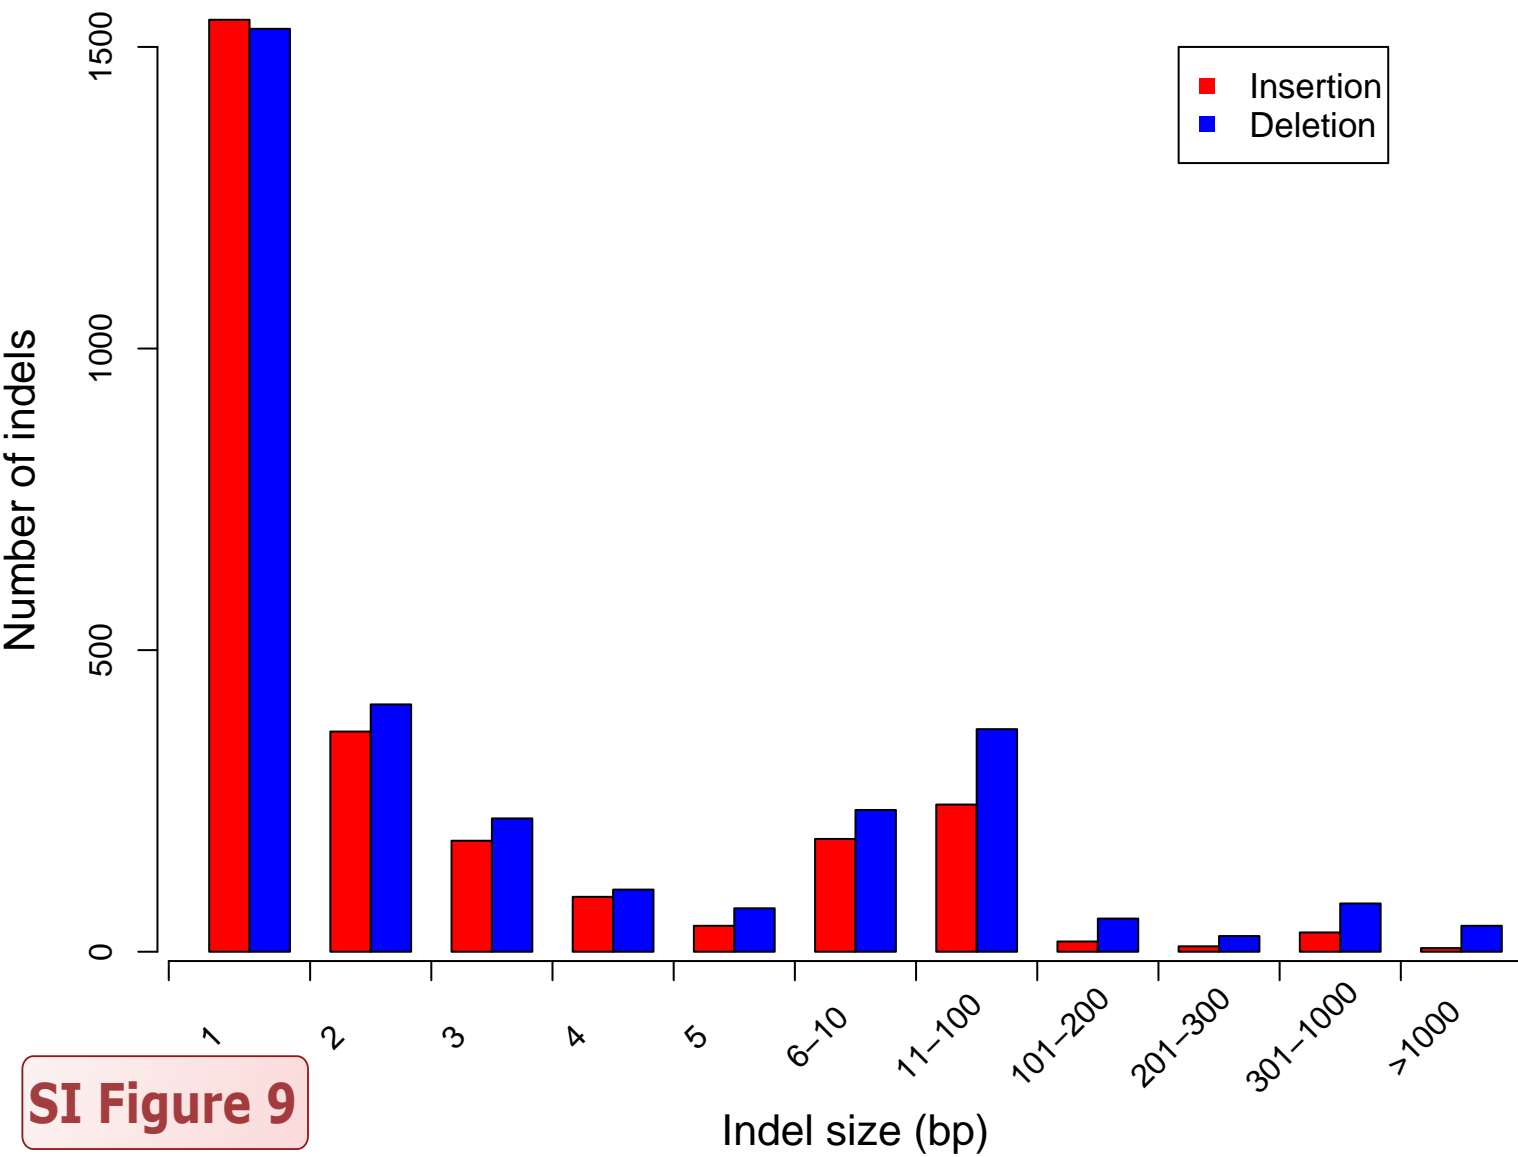

Supplement: pnas_0701291104_5.pdf [file pnas_0701291104_5.pdf]

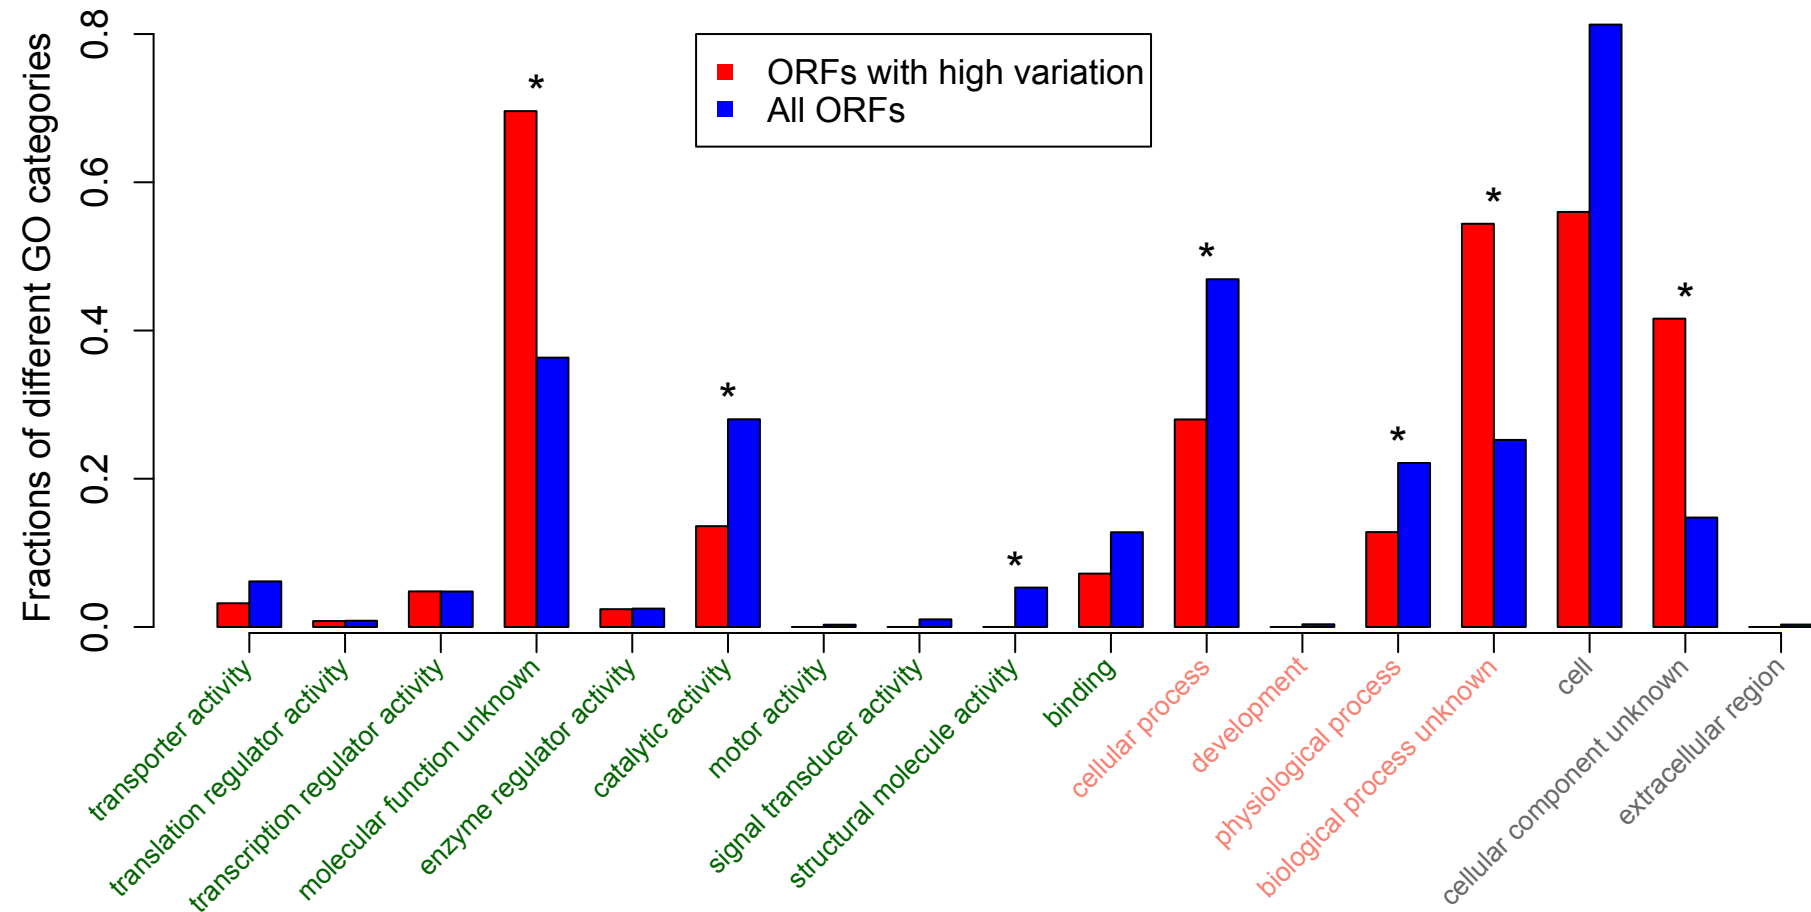

SI Figure 10

Different GO categories

Supplement: pnas_0701291104_6.pdf [file pnas_0701291104_6.pdf]
